# Supplementary material
Source: Springer Nature journal article supplement (https://www.springermedizin.de/resource/supplementary/12985_2010_1019_MOESM2_ESM.pdf/9608966)
Supplement: MOESM2 [file 9608966]

A

← → → **TATA-box**  
 EuMV-Ja1 TTTTGTAAATTATGACCCAGGACTCCAAGG-GAG--CTCTCTCATAAAACCTATTGTGTTGTGGAGTCTGGAGTCCATTTATACATAAA-GTCCTCTA--  
 EuMV-JM TTTTGTAAATTATGACCCAGGACTCCAAGG-GAG--CTCTCTCATAAAACCTATTGTGTTGTGGAGTCTGGAGTCCATTTATACATAAA-G-CCTCTA--  
 EuMV-Yuc TTTTGTAAATATAAGCCAGGACACCAAGGTGA--CTCTCTCATAAAACCTATATTGCTGGTGTCTGGTGTCCATTTATAC-TAAAAGT-CTCTGGG  
 EuMV-PR TTTTGTAAATATAAGCCAGGACACCAAGGTGA--CTCTCTCATAAAACCTATATTGCTGGTGTCTGGTGTCCATTTATAC-TAAAAGT-CTCTGGG  
 EuYMV-BZ AATTGTAAATATAAGCCAGGACACCAAGGGGAGTCTCTCT--AAAACCTATTTTTCGTGGTGTCTGGTGTCCATTTATAC-TAAAAG-CCTCAGGG  
 EuMPV TTTTGTAAATATAGCCCAGGACACCAAGGGGAG--CTCTCTC-AAAATCTTATTTTGTGGTGTCTGGTGTCCATTTATAC-TAAAAG-CCTCTTG-

← → **stem-loop** →  
 EuMV-Ja1 GGACTCCA-AGGGGCACGTGGCGGCCATCCGCAATAATATTACCGGATGGCCGCGATTTTTTCGGAGTCCCT-----CGGCCAGGCCCAAACGCA  
 EuMV-JM GGACTCCAAGAGGGGCACGTGGCGGCCATCCGCAATAATATTACCGGATGGCCGCGATTTTTTCGGAGTCCCT-----CGGCCAGGCCCAAACGCA  
 EuMV-Yuc GGACACTA--GGGGCAAAA-GCGGCCATCCGCAATAATATTACCGGATGGCCGCGATTTTTTGGTGTCCCTTAGCCCGGCCAGGCCCAAACGCA  
 EuMV-PR GGACACTA--GGGGCAAAA-GCGGCCATCCGCAATAATATTACCGGATGGCCGCGATTTTTTGGTGTCCCTTAGCCCGGCCAGGCCCAAACGCA  
 EuYMV-BZ GGACACCA--GGGGCAAAA-GCGGCCATCC--TATAATATTACCGGATGGCCGCGATTTTT-TGGTGTCCCTAT-CCCGGCCAGGCCCAAACGCA  
 EuMPV GGACACCA-----AAAATCGCGGCCATCCG--ATAATATTATAGGATGGCCGCGATTTTTTGGTGTCCCTTTTAA-GGCCAGGCCCAAACGCA

B

← → → **TATA-box**  
 EuMV-Ja1 TTTTGTAAATTATGACCCAGGACTCCAAGGGGAG-CTCCCTCATAAAACCTATTGTGTTGTGGAGTCTGGAGTCCATTTATACATAAA-GCCTCTA  
 EuMV-JM TCTGGTAAATATGACCCAGGACTCCAAGGGAG-CTCTCTCATAAAACCTATTGTGTTGTGGAGTCTGGAGTCCATTTATACATAAA-GTCTCTA  
 EuMV-Yuc TTTTGTAAATATGACCCAGGACACCA--GGGAGGCTCTCTCATAAAACCTATATTGCTGGTGTCTGGTGTCCATTTATAC-TAGAAGTCTCTA  
 EuYMV-BZ ATTTGTAAATATAAGCCAGGACACCAAGGGGAGTCTCTCA-AAAACCTATTTTTTCGTGGTGTCTGGTGTCCATTTATAC-TAAAAGCCTCTA

← → **stem-loop** →  
 EuMV-Ja1 GGACTCCAAGAGGGGCACGTGGCGGCCATCCGCAATAATATTACCGGATGGCCGCGATTTGTTTCGGAGTCCCTCC-GTTCCTCGGCCAGGCCCAAACGCA  
 EuMV-JM GGACTCCAAGAGGGGCACGTGGCGGCCATCCGCAATAATATTACCGGATGGCCGCGATTTTTTTCGGAGTCC-CCCGTCTCGGCCAGGCCCAAACGCA  
 EuMV-Yuc GGACACCAAGGGGGCACGTGGCGGCCATCCGCAATAATATTACCGGATGGCCGCGATTTTTTTCGGTGTCC-CCGTCTCGGCCAGGCCCAAACGCA  
 EuYMV-BZ GGACACCA-GGGGGTACGTGGCGGCCATCCG-TATAATATTACCGGATGGCCGCGA-TTTTTTGGTGTCCCTATCCCC-GGCCAGGCCCAAACGCA

C

| iteron            | motif I                         |          |
|-------------------|---------------------------------|----------|
| TGG <u>A</u> GTCC | MPRNPNSFRI <u>Q</u> ARNIFLTYPQC | EuMV-Ja1 |
|                   | MPRNPNSFRL <u>Q</u> ARNIFLTYPQC | EuMV-JM  |
|                   | *                               |          |
|                   | MPRNPNSFRLAAKSIFFTYPQC          | EuMV-PR  |
|                   | MPRNPNSFRLAAKSIFLTYPQC          | EuMV-Yuc |
| TGG <u>T</u> GTCC | MPRNPNSFRLTAKNIFLTYPQC          | EuYMV-BZ |
|                   | MPRNPNSFRLTAKNIFLTYPRC          | EuMPV    |
|                   | *                               |          |
